# Supplementary figures and images for: Sex-specific effects of intermittent fasting on hippocampal neurogenesis via the gut-brain axis
Source: Royal Society of Chemistry journal article supplement (doi:10.1039/d4fo00318g), 2024-01-01

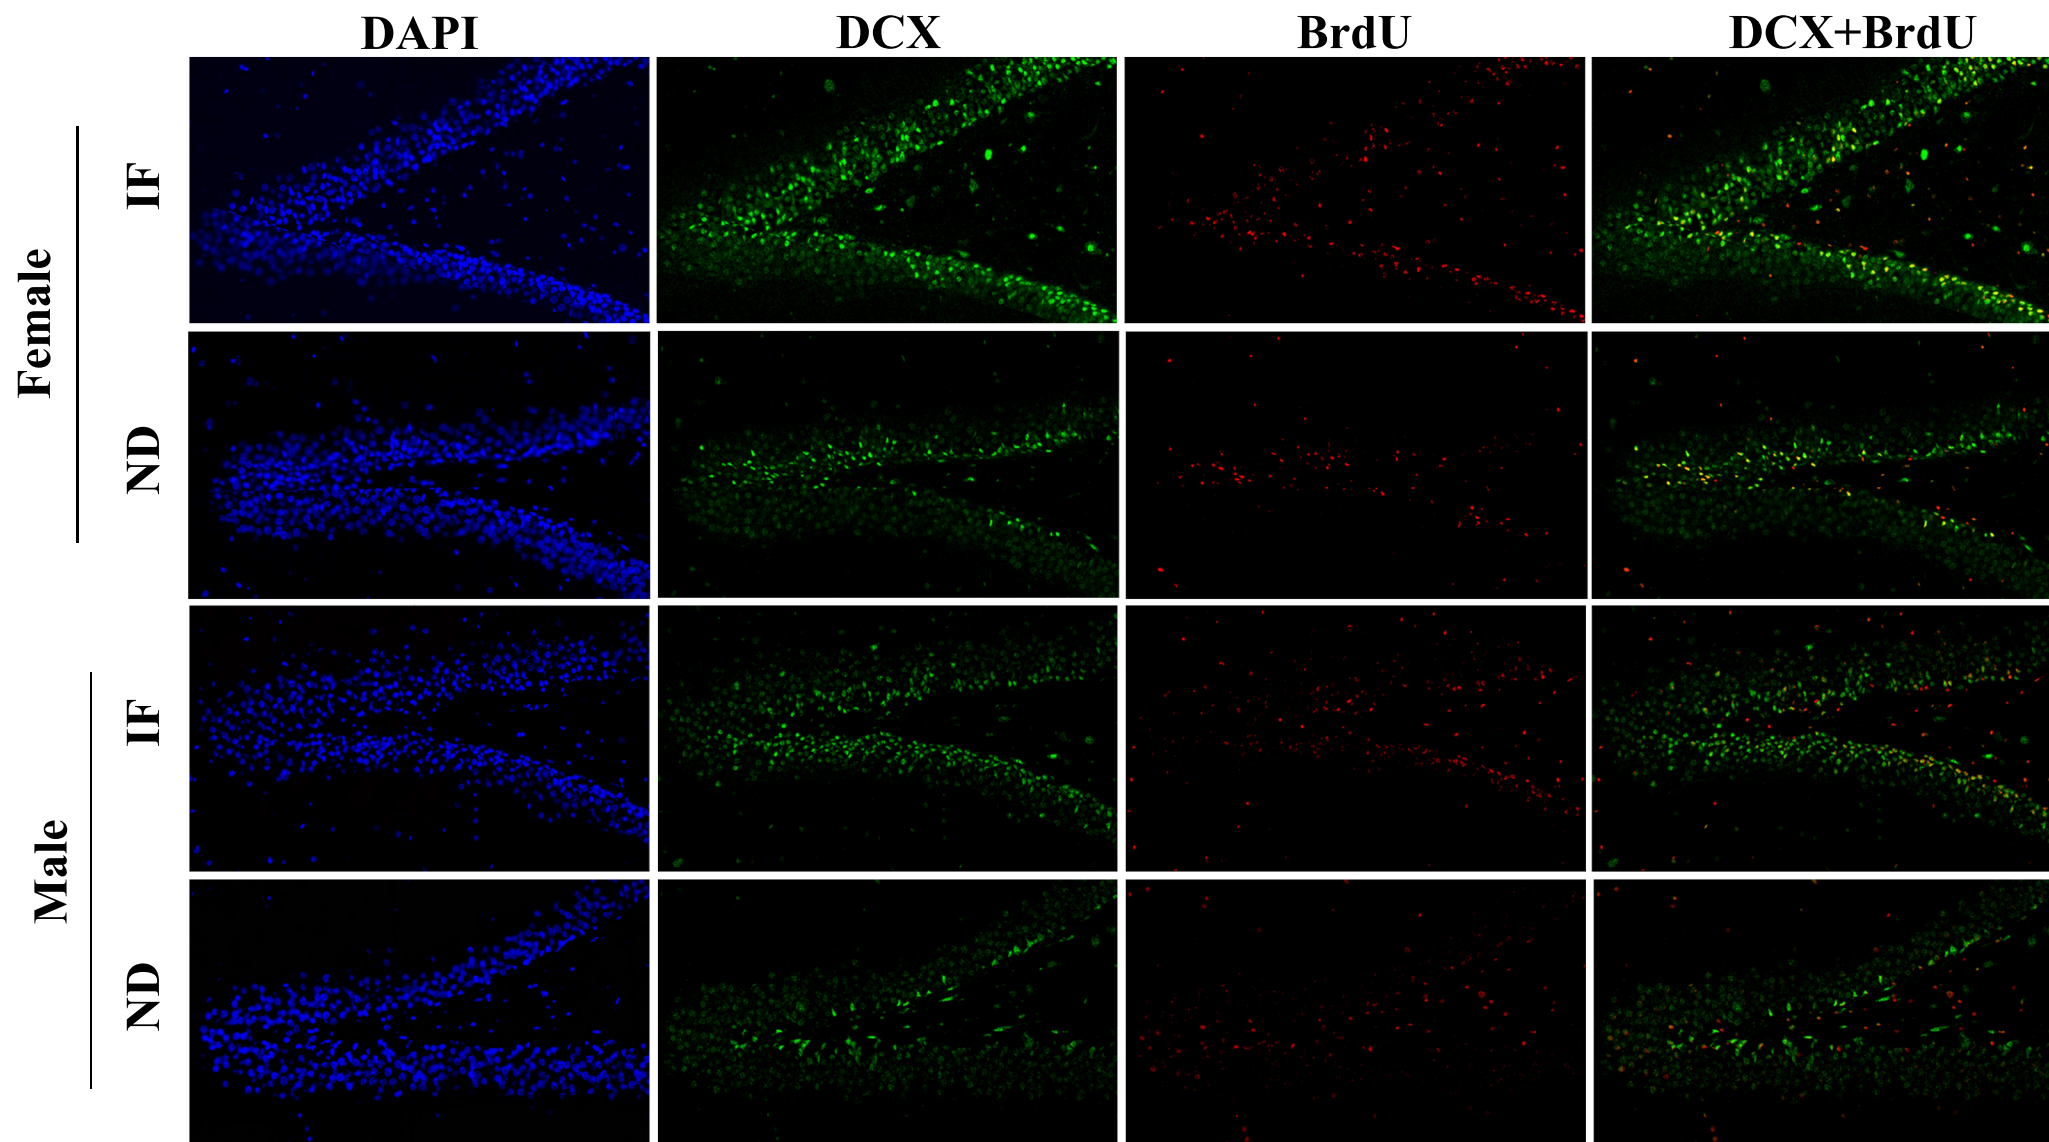

Supplement: d4fo00318g1.pdf [file d4fo00318g1.pdf]

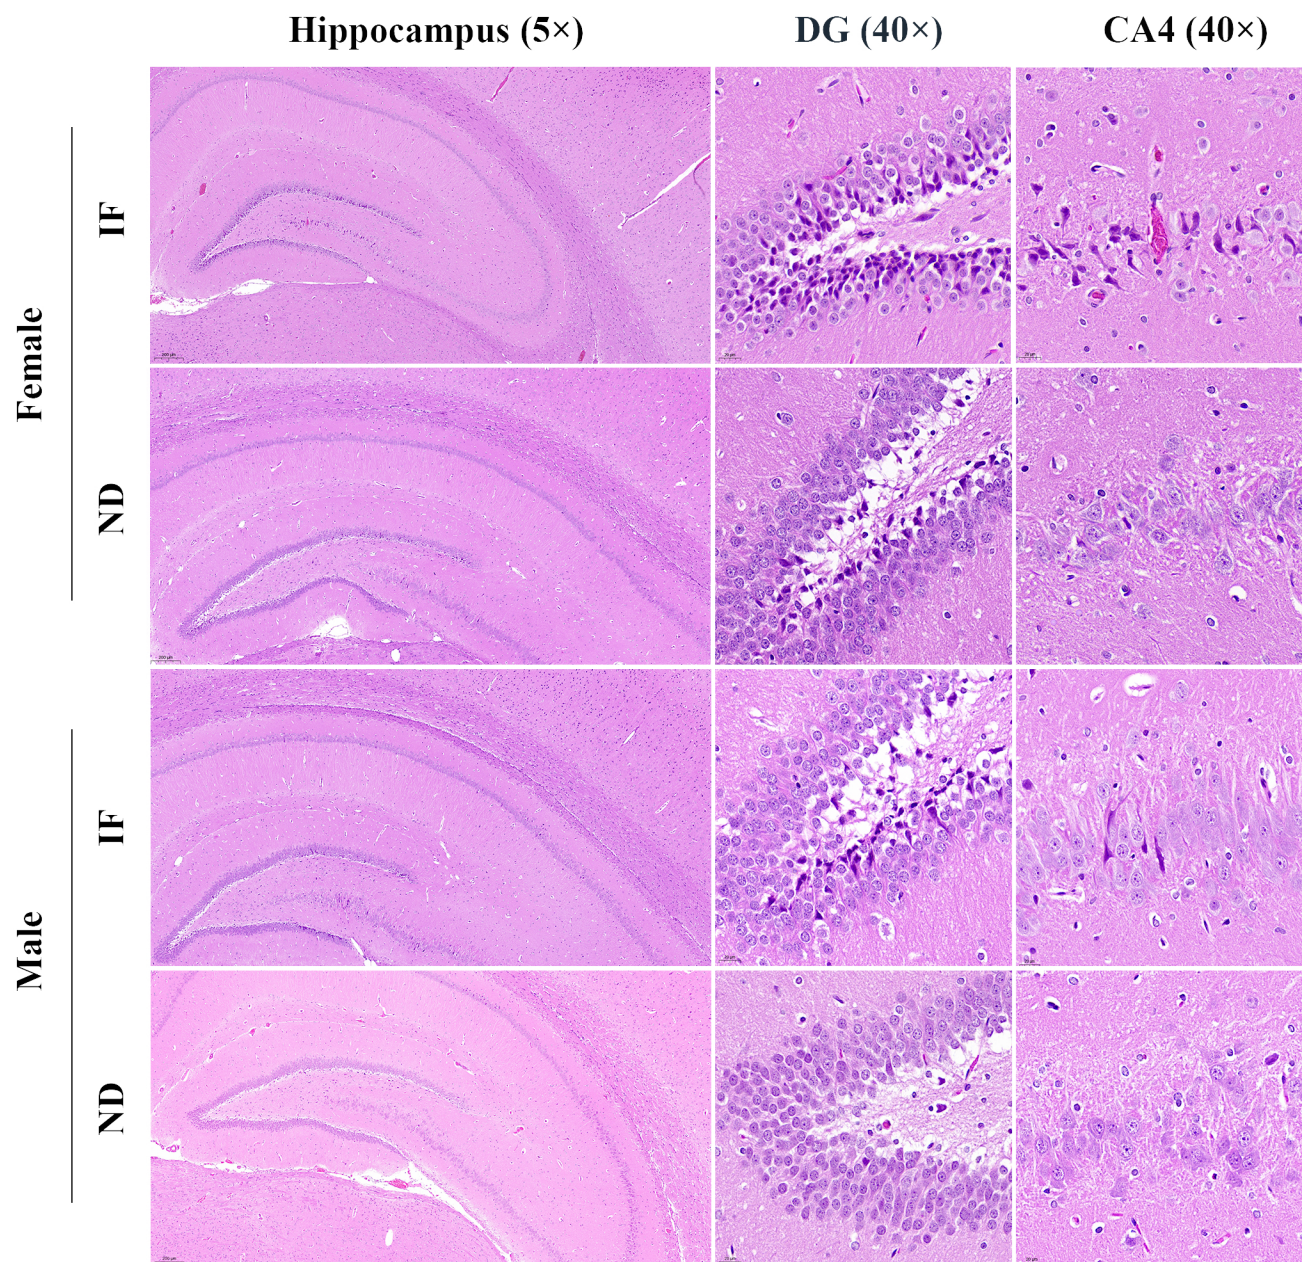

Supplement: d4fo00318g3.pdf [file d4fo00318g3.pdf]
